# Supplementary material for: Protective Role of Limitrin in Experimental Autoimmune Optic Neuritis
Source: PubMed Central journal article supplement — Invest Ophthalmol Vis Sci. 2021 Jul 7;62(9):8. doi: 10.1167/iovs.62.9.8 (PMC8267184; doi:10.1167/iovs.62.9.8), 2021-07-07
Supplement: iovs-62-9-8_s001.pdf [file iovs-62-9-8_s001.pdf]

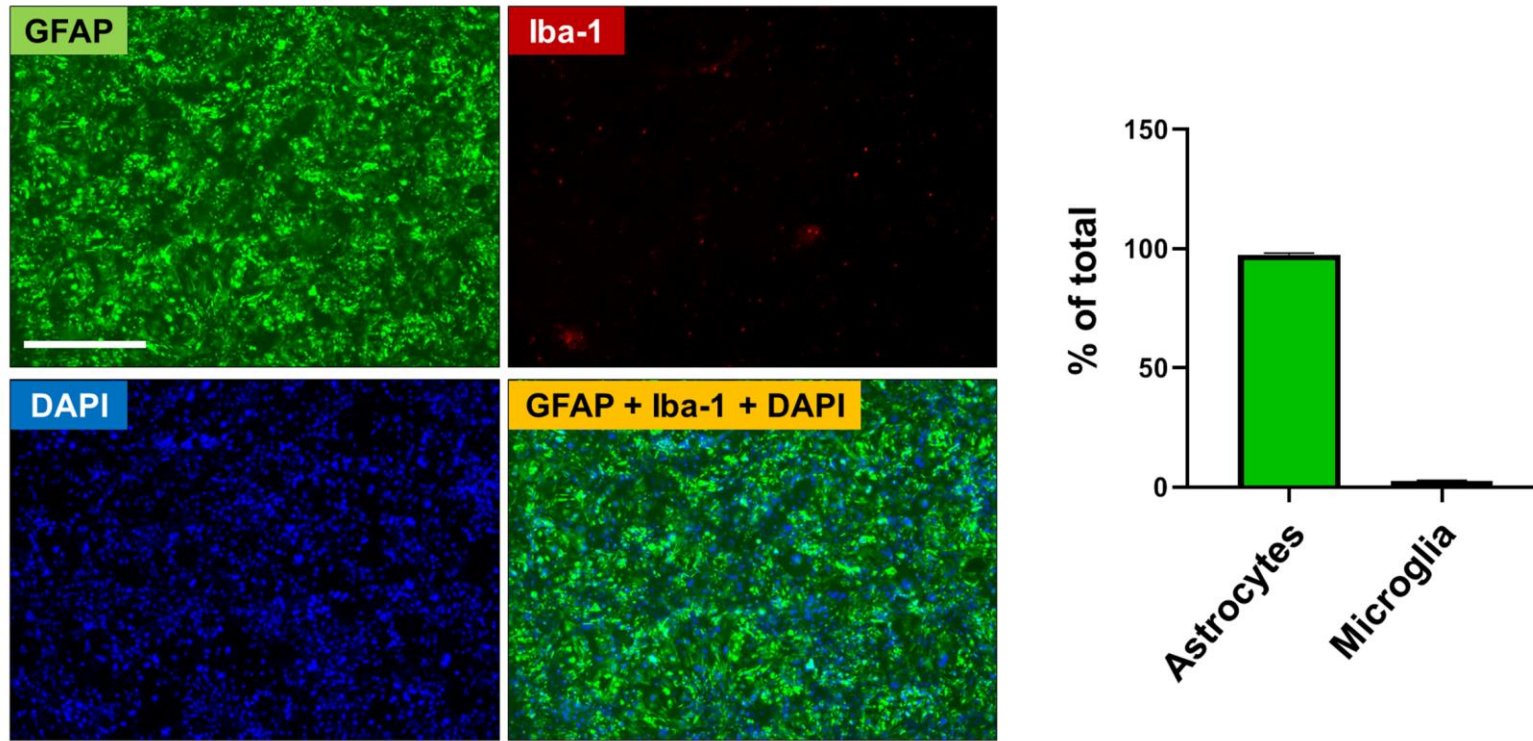

Supplementary Figure 1. Fluorescence-based evaluation of purity of astrocyte culture after isolation from the mixed glial cell (MGC) culture. Cells were immunostained with anti-glial fibrillary acidic protein (GFAP) (1:1000; green) and anti-ionized calcium-binding adapter molecule-1 (Iba-1) (1:1000; red) antibodies. DAPI (blue) was used for counterstaining. Scale bar = 500  $\mu\text{m}$ .
