# Supplementary material for: Protective Role of Limitrin in Experimental Autoimmune Optic Neuritis
Source: PubMed Central journal article supplement — Invest Ophthalmol Vis Sci. 2021 Jul 7;62(9):8. doi: 10.1167/iovs.62.9.8 (PMC8267184; doi:10.1167/iovs.62.9.8), 2021-07-07
Supplement: iovs-62-9-8_s002.pdf [file iovs-62-9-8_s002.pdf]

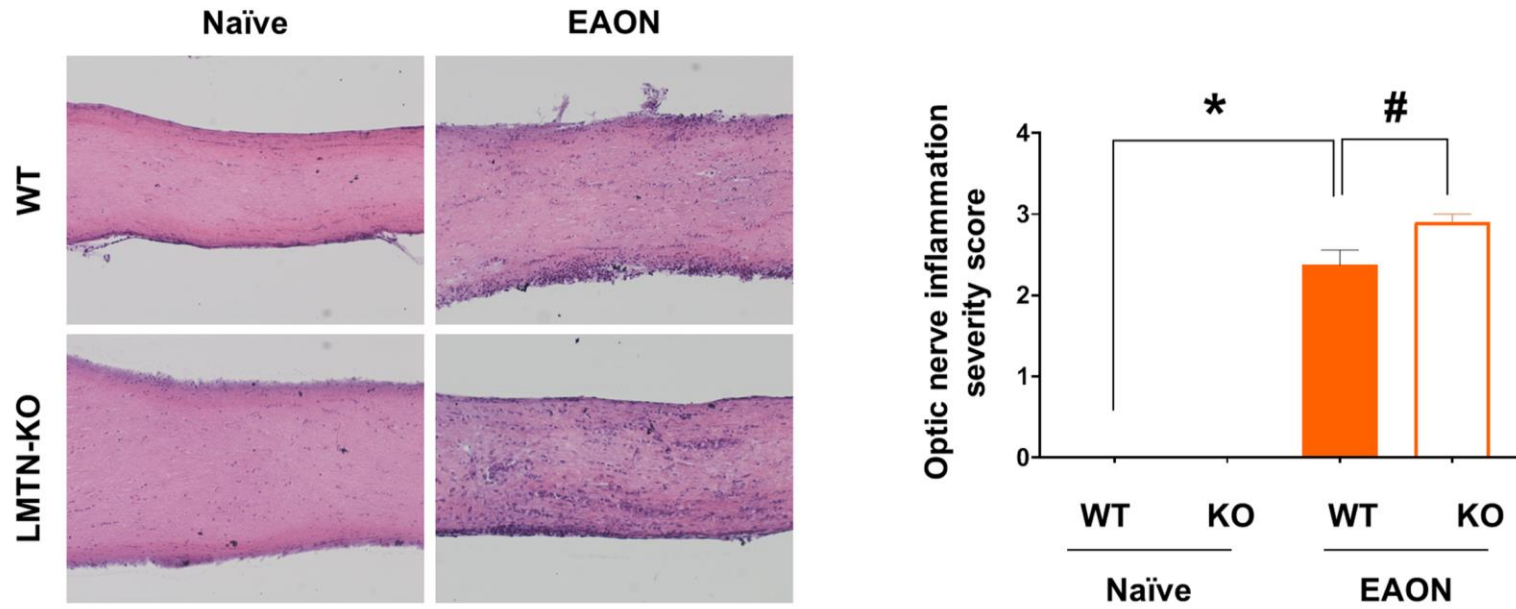

Supplementary Figure 2. Representative longitudinal cross sections of optic nerves stained with hematoxylin & eosin (H&E). Right panel: Images of optic nerves were graded for inflammation by a blinded investigator according to the following scale: 0 = absent or minimal infiltration, 1 = moderate infiltration throughout, 2 = moderate infiltration with severe areas, 3 = severe infiltration throughout. Data are expressed as mean  $\pm$  SEM [naïve (WT,  $n = 9$ ; LMTN-KO,  $n = 7$ ) and EAON-induced (WT,  $n = 7$ ; LMTN-KO,  $n = 13$ ) mice at 17 days post immunization]. Mann-Whitney  $U$  test. \* $p < 0.05$ , naïve mice versus EAON-induced mice; # $p < 0.05$ , EAON-induced WT mice versus EAON-induced LMTN-KO mice. EAON, experimental autoimmune optic neuritis; LMTN, limitrin; KO, knock-out; WT, wild type.
